# Supplementary material for: Metal catalyst-free N-allylation/alkylation of imidazole and benzimidazole with Morita–Baylis–Hillman (MBH) alcohols and acetates
Source: publisher site journal article supplement (doi:10.3762/bjoc.19.93), 2023-09-01
Supplement: Additional file 1 [file 1860-5397-19-93-S1.pdf]

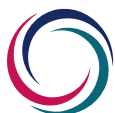

## Supporting Information

for

### **Metal catalyst-free N-allylation/alkylation of imidazole and benzimidazole with Morita–Baylis–Hillman (MBH) alcohols and acetates**

Olfa Mhasni, Jalloul Bouajila and Farhat Rezgui

*Beilstein J. Org. Chem.* **2023**, *19*, 1251–1258. [doi:10.3762/bjoc.19.93](https://doi.org/10.3762/bjoc.19.93)

### **Full experimental details and characterization data of all new compounds**

## Experimental section

All cyclic MBH alcohols **4** [1-3], acetates **5** [4], and acyclic MBH alcohols **1a,f** [5-7] were obtained as previously described. IR spectra were recorded on a Bruker (IFS 66v/S) spectrometer.  $^1\text{H}$  NMR and  $^{13}\text{C}$  NMR spectra were recorded either on a Bruker AC-500 spectrometer (500 MHz for  $^1\text{H}$  and 125 MHz for  $^{13}\text{C}$ ) or an AC-300 spectrometer (300 MHz for  $^1\text{H}$  and 75 MHz for  $^{13}\text{C}$ ) in  $\text{CDCl}_3$ , using TMS as an internal standard (chemical shifts in  $\delta$  values,  $J$  in Hz). High resolution mass spectra (HRMS) were recorded as EI-HRMS on an Autospec Ultima/micromass mass spectrometer. Analytical thin layer chromatography (TLC) was performed using Fluka Kieselgel 60 F254 pre-coated silica gel plates. Visualization was achieved by UV light (254 nm). Flash chromatography was performed using Merck silica gel 60 and a gradient solvent system ether/acetone as eluent.

### Typical procedure for the $\alpha$ -substitution of cyclic MBH adducts with imidazoles

A mixture of allyl acetate **5a** (2 mmol, 0.33 g) or allyl alcohol **4a** (2 mmol, 0.25 g) and imidazole (**2a**, 4 mmol, 0.27 g) in toluene (25 mL) was heated under reflux (for **5a**) or in a Dean stark apparatus (for **4a**). After completion (TLC), the reaction mixture was cooled, washed with brine, and dried. The toluene was removed and the residue was purified by column chromatography on silica gel (acetone/ether 8:2) to give the pure N-substituted imidazole **6a**.

### 2-((1*H*-Imidazol-1-yl)methyl)cyclohex-2-enone (**6a**) [8]

Yield: 82%; yellow oil;  $\nu$  ( $\text{CHCl}_3$ ) 2932, 1666, 1503, 1380, 1227, 1074  $\text{cm}^{-1}$ ;  $^1\text{H}$  NMR ( $\text{CDCl}_3$ , 500 MHz):  $\delta_{\text{H}}$  7.47 (s, 1H), 7.01 (s, 1H), 6.89 (s, 1H), 6.64 (t,  $J$  = 4.0 Hz, 1H), 4.70 (s, 2H), 2.47–2.35 (m, 4H), 2.04–1.98 (m, 2H);  $^{13}\text{C}$  NMR ( $\text{CDCl}_3$ , 125 MHz):  $\delta_{\text{C}}$  197.6, 147.7, 137.6, 135.2, 129.3, 119.4, 45.5, 37.9, 25.8, 22.6; HRMS (EI):  $\text{MH}^+$ , found 177.1022.  $\text{C}_{10}\text{H}_{13}\text{N}_2\text{O}$  requires 177.1028.

### **2-((1*H*-Imidazol-1-yl)methyl)cyclopent-2-enone (6b)**

Yield: 65%; yellow oil;  $\nu$  (CHCl<sub>3</sub>) 2924, 1693, 1504, 1388, 1227, 1073 cm<sup>-1</sup>; <sup>1</sup>H NMR (CDCl<sub>3</sub>, 500 MHz):  $\delta_{\text{H}}$  7.39 (s, 1H), 7.34 (t,  $J = 4.0$  Hz, 1H), 7.02 (s, 1H), 6.94 (s, 1H), 4.71 (s, 2H), 2.64–2.60 (m, 2H), 2.46–2.43 (m, 2H); <sup>13</sup>C NMR (CDCl<sub>3</sub>, 125 MHz):  $\delta_{\text{C}}$  207.2, 160.2, 142.1, 137.4, 129.5, 119.3, 41.7, 34.6, 26.7; HRMS (EI): MH<sup>+</sup>, found 163.0866. C<sub>9</sub>H<sub>11</sub>N<sub>2</sub>O requires 163.0871.

### **2-((1*H*-Imidazol-1-yl)ethyl)cyclohex-2-enone (6c)**

Yield: 75%; yellow oil;  $\nu$  (CHCl<sub>3</sub>) 2935, 1665, 1497, 1381, 1226, 1077 cm<sup>-1</sup>; <sup>1</sup>H NMR (CDCl<sub>3</sub>, 500 MHz):  $\delta_{\text{H}}$  7.55 (s, 1H), 7.03 (s, 1H), 6.93 (s, 1H), 6.57 (t,  $J = 4.0$  Hz, 1H), 5.34 (q,  $J = 6.2$  Hz, 1H), 2.47–2.36 (m, 4H), 2.02–1.96 (m, 2H), 1.62 (d,  $J = 6.2$  Hz, 3H); <sup>13</sup>C NMR (CDCl<sub>3</sub>, 125 MHz):  $\delta_{\text{C}}$  197.3, 145.4, 140.4, 136.2, 128.9, 117.8, 50.4, 38.4, 25.7, 22.4, 19.8; MS (m/z): 191 (13), 190 (M<sup>+</sup>, 100), 189 (8), 175 (15), 162 (16), 149 (7), 134 (7), 123 (62), 107 (10), 95 (48), 81 (27), 79 (38), 69 (50), 67 (75), 55 (50); HRMS (EI): MH<sup>+</sup>, found 191.1188. C<sub>11</sub>H<sub>15</sub>N<sub>2</sub>O requires 191.1184.

### **2-((1*H*-Imidazol-1-yl)ethyl)cyclopent-2-enone (6d)**

Yield: 69%; yellow oil;  $\nu$  (CHCl<sub>3</sub>) 2926, 1695, 1496, 1395, 1227, 1077 cm<sup>-1</sup>; <sup>1</sup>H NMR (CDCl<sub>3</sub>, 500 MHz):  $\delta_{\text{H}}$  7.59 (s, 1H), 7.28 (t,  $J = 4.0$  Hz, 1H), 7.03 (s, 1H), 7.01 (s, 1H), 5.11 (q,  $J = 6.0$  Hz, 1H), 2.62–2.60 (m, 2H), 2.46–2.43 (m, 2H), 1.71 (d,  $J = 6.0$  Hz, 3H); <sup>13</sup>C NMR (CDCl<sub>3</sub>, 125 MHz):  $\delta_{\text{C}}$  207.2, 159.1, 146.6, 136.0, 129.0, 117.8, 49.1, 35.2, 26.6, 19.5; MS (m/z): 177 (12), 176 (M<sup>+</sup>, 100), 175 (7), 161 (1), 147 (9), 109 (43), 81 (54), 79 (74), 69 (33), 67 (13), 53 (31); HRMS (EI): MH<sup>+</sup>, found 177.1031. C<sub>10</sub>H<sub>13</sub>N<sub>2</sub>O requires 177.1028.

### **2-((1*H*-Benzimidazol-1-yl)ethyl)cyclohex-2-enone (7a)**

Yield: 87%; yellow oil; <sup>1</sup>H NMR (CDCl<sub>3</sub>, 500 MHz): δ<sub>H</sub> 8.03 (s, 1H), 7.73–7.71 (m, 1H), 7.21–7.15 (m, 3H), 6.49 (t, *J* = 4.0 Hz, 1H), 5.52 (q, *J* = 6.0 Hz, 1H), 2.38–2.34 (m, 2H), 2.25–2.19 (m, 2H), 1.89–1.83 (m, 2H), 1.70 (d, *J* = 6.0 Hz, 3H); <sup>13</sup>C NMR (CDCl<sub>3</sub>, 125 MHz): δ<sub>C</sub> 197.5, 146.0, 143.7, 141.3, 133.9, 133.2, 122.8, 122.1, 120.1, 110.4, 49.1, 38.1, 25.6, 22.3, 19.4 ; MS (m/z): 241 (17), 240 (M<sup>+</sup>, 100), 239 (10), 226 (15), 225 (100), 211 (10), 197 (7), 183 (5), 169 (5), 145 (14), 119 (15), 118 (55), 91 (8), 77 (7), 67 (9), 55 (5); HRMS (EI): MH<sup>+</sup>, found 241.1347. C<sub>15</sub>H<sub>17</sub>N<sub>2</sub>O requires 241.1341.

### **2-((1*H*-Benzimidazol-1-yl)methyl)cyclohex-2-enone (7b)**

Yield: 80%; yellow oil; <sup>1</sup>H NMR (CDCl<sub>3</sub>, 500 MHz): δ<sub>H</sub> 7.85 (s, 1H), 7.68–7.62 (m, 1H), 7.22–7.08 (m, 3H), 6.49 (t, *J* = 4.0 Hz, 1H), 4.78 (s, 2H), 2.30–2.25 (m, 2H), 2.15–2.10 (m, 2H), 1.82–1.74 (m, 2H); <sup>13</sup>C NMR (CDCl<sub>3</sub>, 125 MHz): δ<sub>C</sub> 197.7, 147.8, 143.6, 143.3, 133.8, 133.3, 122.6, 121.7, 119.9, 109.6, 43.2, 37.6, 25.3, 22.2; MS (m/z): 227 (16), 226 (M<sup>+</sup>, 100), 225 (33), 211 (5), 198 (28), 197 (19), 183 (7), 170 (30), 169 (24), 157 (7), 131 (22), 118 (15), 104 (4), 90 (5), 77 (7), 63 (3), 53 (6); HRMS (EI): MH<sup>+</sup>, found 227.1189. C<sub>14</sub>H<sub>15</sub>N<sub>2</sub>O requires 227.1184.

### **2-((1*H*-Benzimidazol-1-yl)methyl)cyclopent-2-enone (7c)**

Yield: 72%; yellow oil; <sup>1</sup>H NMR (CDCl<sub>3</sub>, 500 MHz): δ<sub>H</sub> 7.92 (s, 1H), 7.75–7.74 (m, 1H), 7.29–7.18 (m, 4H), 4.87 (s, 2H), 2.51–2.49 (m, 2H), 2.39–2.37 (m, 2H); <sup>13</sup>C NMR (CDCl<sub>3</sub>, 125 MHz): δ<sub>C</sub> 207.6, 160.6, 143.6, 143.4, 140.9, 133.4, 123.1, 122.2, 120.3, 109.6, 39.7, 34.5, 26.7; MS (m/z): 213 (14), 212 (M<sup>+</sup>, 100), 211 (46), 197 (2), 184 (11), 183 (39), 169 (17), 156 (21), 131 (10), 118 (14), 104 (5), 90 (4), 77 (5), 63 (3), 53 (3); HRMS (EI): MH<sup>+</sup>, found 213.1033. C<sub>13</sub>H<sub>13</sub>N<sub>2</sub>O requires 213.1028.

## **2-((1*H*-Benzimidazol-1-yl)ethyl)cyclopent-2-enone (7d)**

Yield: 85%; yellow oil;  $^1\text{H}$  NMR ( $\text{CDCl}_3$ , 500 MHz):  $\delta_{\text{H}}$  8.01 (s, 1H), 7.72–7.69 (m, 1H), 7.25–7.12 (m, 4H), 5.25 (q,  $J = 6.0$  Hz, 1H), 2.46–2.42 (m, 2H), 2.31–2.30 (m, 2H), 1.74 (d,  $J = 6.0$  Hz, 3H);  $^{13}\text{C}$  NMR ( $\text{CDCl}_3$ , 125 MHz):  $\delta_{\text{C}}$  207.1, 159.3, 145.1, 143.4, 141.1, 132.9, 122.7, 122.1, 120.02, 110.2, 47.4, 34.8, 26.2, 18.6; MS ( $m/z$ ): 227 (16), 226 ( $\text{M}^+$ , 100), 225 (8), 211 (38), 197 (14), 183 (13), 169 (4), 156 (1), 119 (12), 118 (74), 109 (8), 91 (9), 79 (14), 77 (7), 63 (5), 53 (7); HRMS (EI):  $\text{MH}^+$ , found 227.1190.  $\text{C}_{14}\text{H}_{15}\text{N}_2\text{O}$  requires 227.1184.

## **Typical procedure for the preparation of imidazole derivatives 8**

A mixture of acyclic MBH alcohol **1** (1 mmol), imidazole (**2a**, 2 mmol) and DABCO (1 mmol), was stirred at reflux temperature of methanol or toluene. After completion of the reaction, the solvent was removed by rotary evaporation and  $\text{CH}_2\text{Cl}_2$  (10 mL) was added. The mixture was washed with brine and dried. Finally, the solvent was removed and the residue was purified by a column chromatography on silica gel, using acetone/ether as eluent, to give the pure imidazole derivative **8**.

## **Ethyl 2-((1*H*-imidazol-1-yl)methyl)-3-hydroxypropanoate (8a)**

Yield: 84%; yellow oil;  $\nu$  ( $\text{CHCl}_3$ ) 3118, 2982, 2934, 1723, 1509, 1451, 1376, 1282, 1225, 1181, 1071  $\text{cm}^{-1}$ ;  $^1\text{H}$  NMR ( $\text{CDCl}_3$ , 300 MHz):  $\delta_{\text{H}}$  7.52 (s, 1H), 6.99 (s, 1H), 6.95 (s, 1H), 4.77 (s, 1H,  $\text{OH}$ ), 4.35 (d,  $J = 6.6$  Hz, 2H), 4.14 (q,  $J = 7.1$  Hz, 2H), 3.81–3.73 (m, 2H), 2.97–2.91 (m, 1H), 1.22 (t,  $J = 7.1$  Hz, 3H);  $^{13}\text{C}$  NMR ( $\text{CDCl}_3$ , 75 MHz):  $\delta_{\text{C}}$  171.8, 137.8, 128.7, 119.6, 61.2, 59.3, 49.2, 44.6, 14.0; HRMS (EI):  $\text{MH}^+$ , found 199.1085.  $\text{C}_9\text{H}_{15}\text{N}_2\text{O}_3$  requires 199.1083.

### **Ethyl 2-((1*H*-imidazol-1-yl)methyl)-3-hydroxy-3-phenylpropanoate (8b)**

Overall yield: 75%; yellow oil; dr = 55:45. Major diastereomer  $^1\text{H}$  NMR ( $\text{CDCl}_3$ , 300 MHz):  $\delta_{\text{H}}$  7.41–7.22 (m, 6H), 6.83–6.76 (m, 2H), 4.85 (d,  $J = 6.7$  Hz, 1H), 4.46–3.81 (m, 4H), 3.19–3.12 (m, 1H), 1.06 (t,  $J = 7.1$  Hz, 3H);  $^{13}\text{C}$  NMR ( $\text{CDCl}_3$ , 75 MHz):  $\delta_{\text{C}}$  172.0, 141.1, 137.3, 129.0, 128.2, 128.2, 126.1, 119.1, 72.6, 61.2, 55.0, 45.6, 13.9. Minor diastereomer  $^1\text{H}$  NMR ( $\text{CDCl}_3$ , 300 MHz):  $\delta_{\text{H}}$  7.41–7.22 (m, 6H), 6.83–6.76 (m, 2H), 4.92 (d,  $J = 7.3$  Hz, 1H), 4.46–3.81 (m, 4H), 3.07–3.01 (m, 1H), 0.91 (t,  $J = 7.1$  Hz, 3H);  $^{13}\text{C}$  NMR ( $\text{CDCl}_3$ , 75 MHz):  $\delta_{\text{C}}$  171.8, 141.7, 137.4, 129.0, 128.4, 128.0, 126.3, 119.3, 72.6, 61., 55.8, 45.3, 13.7; HRMS (EI):  $\text{MH}^+$ , found 275.1402.  $\text{C}_{15}\text{H}_{19}\text{N}_2\text{O}_3$  requires 275.1396.

### **Methyl 2-((1*H*-imidazol-1-yl)methyl)-3-hydroxybutanoate (8c)**

Overall yield: 70%; yellow oil; dr = 59:41. Major diastereomer  $^1\text{H}$  NMR ( $\text{CDCl}_3$ , 300 MHz):  $\delta_{\text{H}}$   $\delta_{\text{H}}$  7.46 (s, 1H), 6.98 (s, 1H), 6.89 (s, 1H), 5.17 (s, 1H, OH), 4.43–4.30 (m, 2H), 4.05–3.99 (m, 1H), 3.62 (s, 3H), 2.84–2.77 (m, 1H), 1.27 (d,  $J = 6.2$  Hz, 3H);  $^{13}\text{C}$  NMR ( $\text{CDCl}_3$ , 75 MHz):  $\delta_{\text{C}}$  172.8, 137.4, 128.8, 119.4, 66.1, 55.5, 52.0, 45.9, 21.9. Minor diastereomer  $^1\text{H}$  NMR ( $\text{CDCl}_3$ , 300 MHz):  $\delta_{\text{H}}$  7.49 (s, 1H), 6.99 (s, 1H), 6.93 (s, 1H), 5.17 (s, 1H, OH), 4.43–4.30 (m, 2H), 4.05–3.99 (m, 1H), 3.67 (s, 3H), 2.92–2.87 (m, 1H), 1.25 (d,  $J = 6.4$  Hz, 3H);  $^{13}\text{C}$  NMR ( $\text{CDCl}_3$ , 75 MHz):  $\delta_{\text{C}}$  172.3, 137.5, 128.9, 119.4, 65.8, 54.3, 52.0, 45.0, 20.7; HRMS (EI):  $\text{MH}^+$ , found 199.1085.  $\text{C}_9\text{H}_{15}\text{N}_2\text{O}_3$  requires 199.1083.

### **3-Hydroxy-2-((1*H*-imidazol-1-yl)methyl)-1-phenylpropan-1-one (8d)**

Yield: 70%;  $^1\text{H}$  NMR ( $\text{CDCl}_3$ , 300 MHz):  $\delta_{\text{H}}$  7.85–7.82 (m, 2H), 7.56–7.36 (m, 4H), 6.90 (s, 1H), 6.87 (s, 1H), 6.41 (s, 1H, OH), 4.52–4.34 (m, 2H), 4.02–3.94 (m, 1H), 3.88–3.70 (m, 2H);  $^{13}\text{C}$  NMR ( $\text{CDCl}_3$ , 75 MHz):  $\delta_{\text{C}}$  199.8, 137.6, 136.1,

133.6, 128.8, 128.7, 128.2, 119.7, 60.7, 51.5, 45.1; HRMS (EI): MH<sup>+</sup>, found 231.1132. C<sub>13</sub>H<sub>15</sub>N<sub>2</sub>O<sub>2</sub> requires 231.1134.

### **1-Hydroxy-2-((1*H*-imidazol-1-yl)methyl)hexan-3-one (8e)**

Yield: 76%; <sup>1</sup>H NMR (CDCl<sub>3</sub>, 300 MHz): δ<sub>H</sub> 7.45 (s, 1H), 6.97 (s, 1H), 6.89 (s, 1H), 4.63 (s, 1H, OH), 4.36–4.17 (m, 2H), 3.80–3.69 (m, 2H), 3.11–3.05 (m, 1H), 2.56–2.26 (m, 2H), 1.56–1.49 (m, 2H), 0.84 (t, *J* = 7.3 Hz, 3H); <sup>13</sup>C NMR (CDCl<sub>3</sub>, 75 MHz): δ<sub>C</sub> 210.6, 137.7, 128.9, 119.5, 59.8, 55.7, 44.9, 44.5, 16.7, 13.5; HRMS (EI): MH<sup>+</sup>, found 197.1293. C<sub>10</sub>H<sub>17</sub>N<sub>2</sub>O<sub>2</sub> requires 197.1290.

### **1-Cyclohexyl-3-hydroxy-2-((1*H*-imidazol-1-yl)methyl)propan-1-one (8f)**

Yield: 73%; <sup>1</sup>H NMR (CDCl<sub>3</sub>, 300 MHz): δ<sub>H</sub> 7.43 (s, 1H), 6.96 (s, 1H), 6.88 (s, 1H), 4.71 (s, 1H, OH), 4.36–4.16 (m, 2H), 3.74–3.41 (m, 2H), 3.31–3.24 (m, 1H), 2.42–2.34 (m, 1H), 1.72–1.54 (m, 5H), 1.43–1.15 (m, 5H); <sup>13</sup>C NMR (CDCl<sub>3</sub>, 75 MHz): δ<sub>C</sub> 213.6, 137.6, 128.8, 119.5, 60.3, 54.4, 50.8, 45.0, 29.6, 28.0, 27.2, 25.7, 25.2; HRMS (EI): MH<sup>+</sup>, found 237.1607. C<sub>13</sub>H<sub>21</sub>N<sub>2</sub>O<sub>2</sub> requires 237.1603.

## **References**

1. Rezgui, F.; El Gaïed, M. M. *Tetrahedron Lett.* **1998**, *39*, 5965.
2. Gatri, R.; El Gaïed, M. M. *Tetrahedron Lett.* **2002**, *43*, 7835.
3. Luo, S.; Wang, P. G.; Cheng, J. P. *J. Org. Chem.* **2004**, *69*, 555.
4. Rezgui, F.; El Gaïed, M. M. *Tetrahedron* **1997**, *53*, 15711.
5. Villieras, J.; Rambaud, M. *Org. Synth. Coll. Vol. VIII*, **1993**, 265.
6. Yu, C.; Luo, B.; Hu, L. *J. Org. Chem.* **2001**, *66*, 5413.
7. Ben Kraïem, J.; Ben Ayed, T.; Amri, H. *Tetrahedron Lett.* **2006**, *47*, 7077.
8. Oueslati, Y.; Baioui, N.; Rezgui, F. *Synth. Commun.* **2017**, *47*, 892.
